# Supplementary material
Source: MDPI journal article supplement (https://www.mdpi.com/1424-8247/13/5/102)
Supplement: s1 [file s1]

## Supplement 1

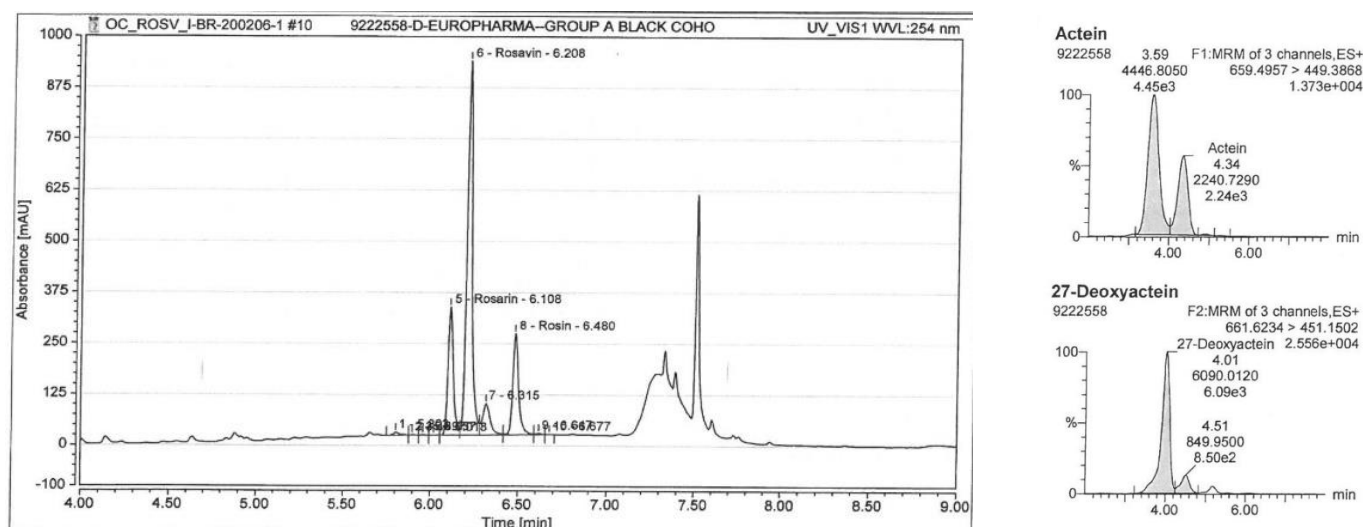

**Fig. S1.** HPLC fingerprints of Menopause relief EP capsules (batch # 180366, analytical sample 9222558), showing the presence of A – phenylpropanoids rosavin (6.2 min) rosarin (6.1 min) and rosin (6.5 min) from *Rodiola rosea* EP-7 extract (200 mg) detected at 254 nm, and B - triterpene glycosides 27-deoxyactein (4.01 min) and actein (4.34 min) from *Cimicifuga racemosa* EP-40 extract (6.5 mg) detected with Waters Xevo TQ MS-WRB 13090 tandem quadrupole mass-spectral detector. Results, mg per serving size (2 capsules): rosavin -12.2, rosarin – 4.6, rosin - 2.6, actein - 0.0135, 27-deoxyactein – 0.0067.

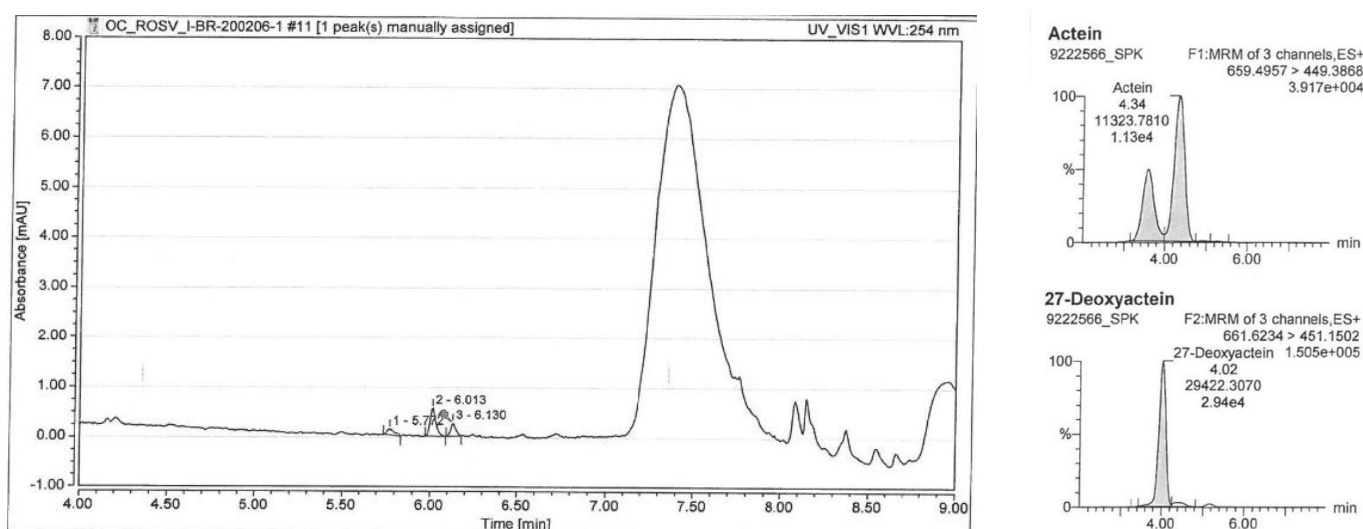

**Fig. S2.** HPLC fingerprints of *Cimicifuga racemosa* EP-40 capsules, 6.5 mg (batch # 180367, analytical sample 9222556), showing A – the lack of phenylpropanoids and B – the presence of triterpene glycosides 27-deoxyactein (4.02 min) and actein (4.34 min) from *Cimicifuga racemosa* EP-40 extract. Results, mg per serving size (2 capsules): actein - 0.0169, 27-deoxyactein – 0.0110.

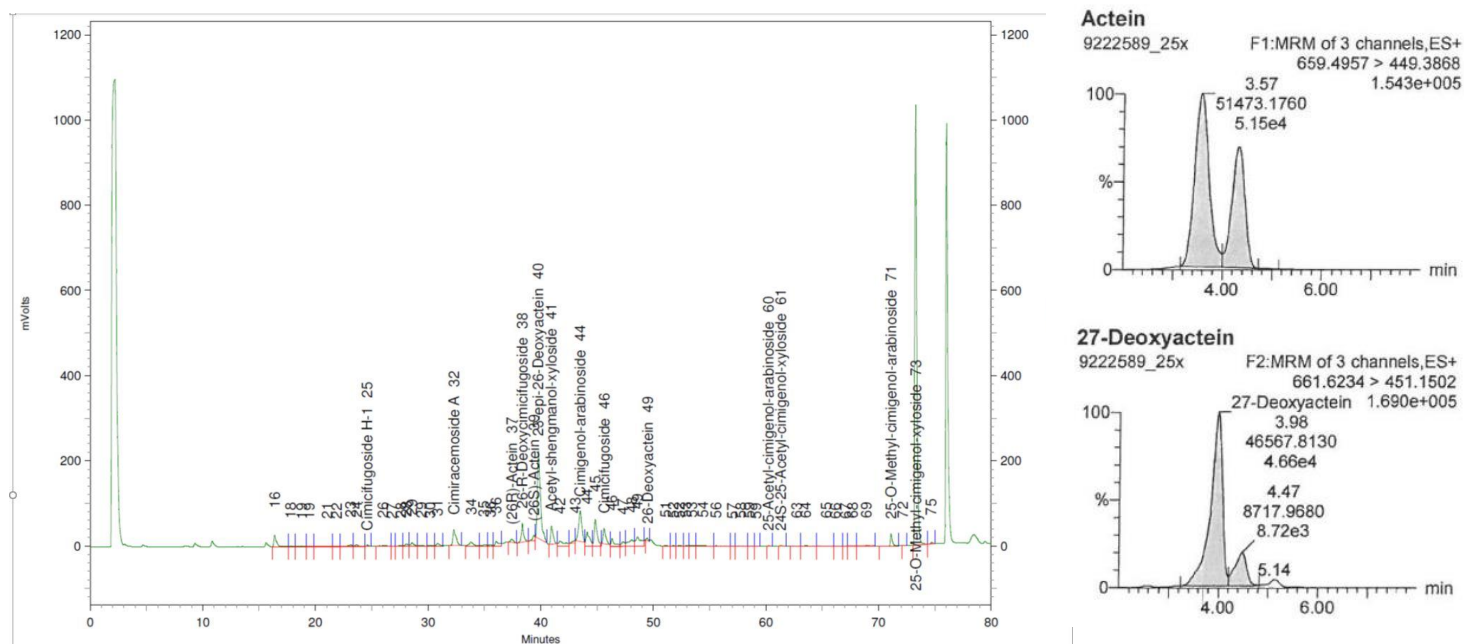

**Fig. S3. A-** HPLC profile of *Cimicifuga racemose* EP-40 capsules, 500 mg (batch # 180368) detected with LC Shimadzu 4 ELSD 2018 evaporative light scattering detector, acquired and processed with EZChem Elite Version 3.3.3 SP2; the results of analysis are shown in the table 1 below. **B -** triterpene glycosides 27-deoxyactein (4.02 min) and actein (4.34 min) detected with Waters Xevo TQ MS-WRB 13090 tandem quadrupole mass-spectral detector, reverse phase HSS T3 UPLC column and formic acid as the mobile phase. Results, mg per serving size (2 capsules): actein - 1.91, 27-deoxyactein – 2.19.

**Table S1.** Results of analysis of *Cimicifuga racemose* EP-40 capsules, 500 mg (batch # 180368,

| Results<br>Pk # | Time   | Name                              | ESTD conc | Area     | Area % |
|-----------------|--------|-----------------------------------|-----------|----------|--------|
| 25              | 24.612 | Cimicifugoside H-1                | 20.577    | 29414    | 0.10   |
| 32              | 32.291 | Cimiracemoside A                  | 123.305   | 696334   | 2.37   |
| 37              | 37.434 | (26R)-Actein                      | 50.225    | 142385   | 0.48   |
| 38              | 38.369 | 26-R-Deoxycimicifugoside          | 112.333   | 590595   | 2.01   |
| 40              | 39.397 | (26S)-Actein                      | 61.892    | 205960   | 0.70   |
| 41              | 39.811 | 23-epi-26-Deoxyactein             | 328.718   | 3939255  | 13.42  |
| 44              | 40.962 | Acetyl-shengmanol-xyloside        | 119.390   | 657732   | 2.24   |
| 46              | 43.521 | Cimigenol-arabinoside             | 180.247   | 1362145  | 4.64   |
| 49              | 45.639 | Cimicifugoside                    | 112.475   | 591917   | 2.02   |
| 60              | 49.480 | 26-Deoxyactein                    | 34.544    | 73481    | 0.25   |
| 61              | 60.244 | 25-Acetyl-cimigenol-arabinoside   | 9.134     | 7001     | 0.02   |
| 71              | 61.301 | 24S-25-Acetyl-cimigenol-xyloside  | 16.039    | 18937    | 0.06   |
| 73              | 71.105 | 25-O-Methyl-cimigenol-arabinoside | 81.680    | 336288   | 1.15   |
|                 | 73.310 | 25-O-Methyl-cimigenol-xyloside    | 654.005   | 13286545 | 45.25  |

## Adverse Events (AEs)

### *Brief summary of adverse events*

In general, during the study period (84  $\pm$  6 days) the treatment was well tolerated and only few cases of non-serious adverse events have been reported in study subjects. These AEs were the following: stomach ache-12 cases; increasing of hot flashes or worsening of existing ones-5 cases; increasing of sweating -2 cases; allergic reactions (itching) -2 cases; vomiting -2 cases; nausea -2 cases; head ache -1 case; increasing of appetite-1 case; anxiety-1 case; sleep disturbances-1 case; increasing of heart beating-tachicardia-1 case; hypertension-1 case; diarrhea-1 case.

In total, these AEs were reported in 21 subjects out of 220 participants (9.5% ). Only one adverse event was experienced by 14 participants and combinations of them were reported in 7 participants. The types of adverse events were the same in all groups.

A serious adverse events were not observed.

### *Display of adverse events*

Basically, the groups were identical regarding to average age, BMI, duration of climacteric syndrome, concomitant disease and treatment (some subjects were taking levothyroxine, metformin, captopril, amlodipine, vitamin D due to hyperthyrosis, hyperinsulinemia, hypertension and vitamin D deficiency accordingly before enrollment and during the study period). 5 types of AEs were revealed in A Group, 4 types- in B Group, 5 types -in C Group. Number of AEs was higher in Placebo group -8 types, but not statistically significant difference was detected between investigation products (Groups A, B and C) and placebo (Group D) with regard to type, frequency and severity of AEs.

Due to adverse events 2 subjects were dropped out from study in A group, 4 subjects-from B group, 1 subject -from C group and 3subjects-from D group.

### *Analysis of adverse events*

Analysis of adverse events observed in all treatment and Placebo groups shows that:

- During study period the subjects experienced only few adverse events ;
- The adverse events were not serious and not needed treatment;
- The types adverse events are the same in all groups;
- Most adverse events are reported in Placebo group;
- There is not statistically significant difference with regard to type, frequency and severity of adverse events between groups.
- The all above mentioned indicates that none of adverse events are related to the investigational product.

It can be concluded that Adverse events identified during study period are not related to the treatment.

### *Deaths, Other Serious Adverse Events, and Other Significant Adverse Events*

Deaths, other serious adverse events, and other significant adverse deserve special attention have not been observed in this study.

### *Safety Conclusions*

The treatment was well tolerated. Serious adverse events were not observed. Safety of investigational product is high.

**Table S2.** Adverse events: treatment emergent signs and symptoms (those not seen at baseline and those that worsened even if present at baseline).

Treatment group A, N=55

| AEs                                                                   | Mild                         |    | Moderate                                                                               |    | Severe  |    | Total                  |    | Total                  |
|-----------------------------------------------------------------------|------------------------------|----|----------------------------------------------------------------------------------------|----|---------|----|------------------------|----|------------------------|
|                                                                       | Related                      | NR | Related                                                                                | NR | Related | NR | Related                | NR | 6 (10.9%)              |
| Head ache                                                             |                              |    | 1 (1.8%) N12<br>(possible)                                                             |    |         |    | 1(1.8%)                |    | 1(1.8%)                |
| Increasing of hot<br>flashes<br>(present at baseline<br>and worsened) |                              |    | 2 (3.6%) N25<br>(unlikely) 1<br>(1.8%) N30<br>(unlikely)<br>1 (1.8%) N30<br>(unlikely) |    |         |    | 2(3.6%)<br><br>1(1.8%) |    | 2(3.6%)<br><br>1(1.8%) |
| Increasing of<br>sweating<br>(hyperhydrosis)                          |                              |    |                                                                                        |    |         |    |                        |    |                        |
| Stomach ache                                                          | 1(1.8%)<br>N37<br>(possible) |    | 1 (1.8%)<br>N103<br>(possible)                                                         |    |         |    | 2(3.6%)                |    | 2(3.6%)                |

Treatment group B, N=55

| AEs                               | Mild                                                                 |    | Moderate                  |    | Severe  |    | Total   |    | Total     |
|-----------------------------------|----------------------------------------------------------------------|----|---------------------------|----|---------|----|---------|----|-----------|
|                                   | Related                                                              | NR | Related                   | NR | Related | NR | Related | NR | 7 (12.7%) |
| Stomach ache                      | 3(5.5%) N86<br>(probable)<br>N96<br>(probable)<br>N196<br>(possible) |    | 1(1.8%) N43<br>(possible) |    |         |    | 4(7.3%) |    | 4(7.3%)   |
| Vomiting                          | 1(1.8%)<br>N173<br>(possible)                                        |    |                           |    |         |    | 1(1.8%) |    | 1(1.8%)   |
| Nausea                            | 1(1.8%)<br>N173<br>(possible)                                        |    |                           |    |         |    | 1(1.8%) |    | 1(1.8%)   |
| Allergic<br>reaction<br>(itching) | 1(1.8%)<br>N173<br>(possible)                                        |    |                           |    |         |    | 1(1.8%) |    | 1(1.8%)   |

Treatment group C, N=55

| AEs                                       | Mild                                               |    | Moderate                      |    | Severe                      |    | Total        |    | Total     |
|-------------------------------------------|----------------------------------------------------|----|-------------------------------|----|-----------------------------|----|--------------|----|-----------|
|                                           | Drug Related                                       | NR | Drug Related                  | NR | Drug Related                | NR | Drug Related | NR | 7 (12.7%) |
| Increase of appetite                      |                                                    |    |                               |    | 1(1.8%)<br>N8<br>(probable) |    | 1(1.8%)      |    | 1(1.8%)   |
| Anxiety                                   |                                                    |    | 1(3.6%)<br>N11<br>(probable)  |    |                             |    | 1(1.8%)      |    | 1(1.8%)   |
| Increasing of heart beating (tachycardia) | 1(1.8%)<br>N36<br>(possible)                       |    |                               |    |                             |    | 1(1.8%)      |    | 1(1.8%)   |
| Stomach ache                              | 2(3.6%)<br>N36<br>(possible)<br>N191<br>(possible) |    | 1(1.8%)<br>N208<br>(possible) |    |                             |    | 3(5.5%)      |    | 3(5.5%)   |
| Diarrhea                                  |                                                    |    | 1(1.8%)<br>N36<br>(possible)  |    |                             |    | 1(1.8%)      |    | 1(1.8%)   |

Treatment group D, N=55

| AEs                                                        | Mild                          |    | Moderate                     |    | Severe                       |    | Total           |         | Total    |
|------------------------------------------------------------|-------------------------------|----|------------------------------|----|------------------------------|----|-----------------|---------|----------|
|                                                            | Placebo Related               | NR | Placebo Related              | NR | Placebo Related              | NR | Placebo Related | NR      | 11 (20%) |
| Sleep disturbances                                         | 1(1.8%)<br>N45<br>(probable)  |    |                              |    |                              |    | 1(1.8%)         |         | 1(1.8%)  |
| Increase of hot flashes (present at baseline and worsened) | 1(1.8%)<br>N45<br>(unlikely)  |    | 1(1.8%)<br>N26<br>(unlikely) |    | 1(1.8%)<br>N47<br>(unlikely) |    | 3(5.5%)         |         | 3(5.5%)  |
| Increasing of sweating                                     |                               |    |                              |    | 1(1.8%) N47<br>(unlikely)    |    | 1(1.8%)         |         | 1(1.8%)  |
| Hypertension                                               |                               |    | 1(1.8%) N47<br>(unlikely)    |    |                              |    | 1(1.8%)         |         | 1(1.8%)  |
| Stomach ache                                               | 1(1.8%)<br>N130<br>(possible) |    | 1(1.8%)<br>N42<br>(possible) |    |                              |    | 2(3.6%)         |         | 2(3.6%)  |
| Vomiting                                                   | 1(1.8%)<br>N130<br>(possible) |    |                              |    |                              |    | 1(1.8%)         | 1(1.8%) | 1(1.8%)  |
| Nausea                                                     | 1(1.8%)<br>N130<br>(possible) |    |                              |    |                              |    | 1(1.8%)         |         | 1(1.8%)  |
| Allergic reaction (itching)                                |                               |    | 1(1.8%)<br>N81<br>(possible) |    |                              |    | 1(1.8%)         |         | 1(1.8%)  |

**Table S3.** Adverse events observed in treatment groups

| Treatment Group | Patients' acronyms | Adverse events                                                                                                                                    | treatment discontinuation due to AE | Total number of patients with AE |
|-----------------|--------------------|---------------------------------------------------------------------------------------------------------------------------------------------------|-------------------------------------|----------------------------------|
| A               | TamKan             | Head ache (from starting the treatment, during several days)                                                                                      |                                     | 5 (9.1%)                         |
| A               | TinTin             | Increasing of hot flashes (after 5 days from starting the treatment, during 2 weeks)                                                              |                                     |                                  |
| A               | MziTso             | Increasing of hot flashes and sweating (after 2 months from starting the treatment during several days )                                          |                                     |                                  |
| A               | AnaGav             | Stomach ache (after 2 months from starting the treatment during several days )                                                                    |                                     |                                  |
| A               | NanKar             | Stomach ache (from starting the treatment)                                                                                                        | Yes                                 |                                  |
| B               | MarTur             | Stomach ache ( from starting the treatment periodically)                                                                                          | Yes                                 | 5 (9.1%)                         |
| B               | TinGum             | Stomach ache (after 1 week from starting the treatment)                                                                                           | Yes                                 |                                  |
| B               | RusSak             | Stomach ache (after 5 days from starting the treatment,)                                                                                          | Yes                                 |                                  |
| B               | NatGog             | Skin rash /pruritis, vomiting, nausea (after 8 days from starting the treatment)                                                                  | Yes                                 |                                  |
| B               | RusPap             | Stomach ache (2 episodes) (after 3 days from starting the treatment, during 3 and 5 days)                                                         |                                     |                                  |
| C               | MaiKed             | Increase of appetite (after 8 days from starting the treatment, during the whole study)                                                           |                                     | 5 (9.1%)                         |
| C               | KhaKup             | Anxiety (from starting the treatment, during 8 days)                                                                                              |                                     |                                  |
| C               | KhaTke             | Increasing of heart beating (from starting the treatment, during 5 days), stomach ache (after 7 weeks from starting the treatment, during 6 days) |                                     |                                  |
| C               | TamKap             | Stomach ache (after 6 weeks from starting the treatment, during 2 weeks)                                                                          | Yes                                 |                                  |
| C               | DarGur             | Stomach ache (after 2 days from starting the treatment, during 10 days), diarrhea (after 2 days from starting the treatment, during 2 days)       |                                     |                                  |
| D               | MaiNiz             | Increasing of hot flashes (after 3 days from starting the treatment, during 13 days)                                                              |                                     | 6 (10.9)                         |
| D               | KhaLil             | Stomach ache (after 1 day from starting the treatment during 3 days)                                                                              |                                     |                                  |
| D               | MziBeg             | Increasing of hot flashes and sleep disturbances (from starting the treatment, during 28 days)                                                    | Yes                                 |                                  |
| D               | NinZed             | Hypertension, (after 2 days from starting the treatment),<br>Increasing of hot flashes and sweating (after 2 months from starting the treatment)  |                                     |                                  |
| D               | TamSid             | Allergic reaction ache (after 2 days from starting the treatment)                                                                                 | Yes                                 |                                  |
| D               | NazAvd             | Stomachache, vomiting, nausea (after 2 days from starting the treatment, during 5 days).                                                          | Yes                                 |                                  |

**Table S4.** Adverse events resulting in treatment discontinuation

| Patient ID | Group | AE                    | Grade | Treatment related | Disease related | Resolved  | Narratives                                                                                                                                                                                                                                                                                                        |
|------------|-------|-----------------------|-------|-------------------|-----------------|-----------|-------------------------------------------------------------------------------------------------------------------------------------------------------------------------------------------------------------------------------------------------------------------------------------------------------------------|
| NanKar     | A     | Gastrointestinal pain | Mild  | possible          | No              | Partially | Patient had multiple lymphogenic lung lesions with respiratory complaints and pericardial effusion at accrual. The symptoms became more severe after the 3rd treatment cycle. After consulting with a cardiologist the patient was withdrawn from the study.                                                      |
| MarTur     | B     | Gastrointestinal pain |       |                   |                 |           | Patient had multiple liver metastases at accrual and slightly elevated transaminases at accrual. After 10 injections of study drugs, the treatment was discontinued due to hepatic failure.                                                                                                                       |
| TinGum     | B     | Gastrointestinal pain |       |                   |                 |           | The patient was withdrawn. According to investigators the event was considered "intolerance" to taxanes.                                                                                                                                                                                                          |
| RusSak     | B     | Gastrointestinal pain |       |                   |                 |           | Patient had an extensive medical history, including hypertension, ischemic coronary disease, and development of pneumonia after a respiratory infection. Withdrawn from the trial.                                                                                                                                |
| NatGog     | B     | Skin rash/ pruritus   |       |                   |                 |           | Patient had chest pain before visit 12 and the ECG was suspicious of myocardial infarction. Patient was referred to a cardiology clinic, where detailed examinations did not reveal infarction, but suggested paclitaxel cardiotoxicity. Patient withdrawn from the trial following cardiologist recommendations. |
|            |       | Vomiting              |       |                   |                 |           |                                                                                                                                                                                                                                                                                                                   |
|            |       | Nausea                |       |                   |                 |           |                                                                                                                                                                                                                                                                                                                   |
| TamKap     | C     | Gastrointestinal pain |       |                   |                 |           |                                                                                                                                                                                                                                                                                                                   |
| MziBeg     | D     | hot flashes           |       |                   |                 |           |                                                                                                                                                                                                                                                                                                                   |
|            |       | sleep disturbances    |       |                   |                 |           |                                                                                                                                                                                                                                                                                                                   |
| TamSid     | D     | Skin rash/ pruritus   |       |                   |                 |           |                                                                                                                                                                                                                                                                                                                   |
| NazAvd     | D     | Stomachache           |       |                   |                 |           |                                                                                                                                                                                                                                                                                                                   |
|            |       | vomiting,             |       |                   |                 |           |                                                                                                                                                                                                                                                                                                                   |
|            |       | nausea                |       |                   |                 |           |                                                                                                                                                                                                                                                                                                                   |

Table S5 Dropout List

| Group | Subject's acronym | Code | Start date | Dropout date | Time to treatment failure TTF | Capsules consumed | Expected to consume | Compliance, % | Reason                                                               |
|-------|-------------------|------|------------|--------------|-------------------------------|-------------------|---------------------|---------------|----------------------------------------------------------------------|
| A     | TAMKAN            | 12   | 30.06.18   | 10.08.18     | 42                            | 84                | 82                  | 102           | No clinical improvement                                              |
| A     | MANROD            | 27   | 15.09.18   | 26.10.18     | 42                            | 98                | 82                  | 110           | No clinical improvement                                              |
| A     | ASKGUM            | 84   | 14.11.18   | 25.12.18     | 41                            | 20                | 82                  | 24            | No clinical improvement                                              |
| A     | IRAGUM            | 85   | 14.11.18   | 25.12.18     | 41                            | 60                | 82                  | 73            | No clinical improvement                                              |
| A     | NANKAR            | 103  | 08.12.18   | 01.03.19     | 82                            | 30                | 164                 | 18            | Adverse event (stomachache)                                          |
| A     | IZEKUC            | 125  | 22.01.19   | 22.03.19     | 60                            | 114               | 120                 | 95            | No clinical improvement                                              |
| A     | CIAURI            | 169  | 14.03.19   | 25.04.19     | 42                            | 84                | 84                  | 100           | No clinical improvement                                              |
| B     | MARTUR            | 43   | 16.10.18   | 24.12.18     | 68                            | 132               | 136                 | 97            | No clinical improvement and adverse event (stomachache)              |
| B     | RUSMET            | 78   | 06.11.18   | 26.11.18     | 20                            | 42                | 40                  | 105           | No clinical improvement                                              |
| B     | TINGUM            | 86   | 14.11.18   | 25.12.18     | 41                            | 20                | 82                  | 24            | Adverse event (stomachache)                                          |
| B     | RUSSAK            | 96   | 27.11.18   | 08.01.19     | 41                            | 10                | 82                  | 12            | Adverse event (stomachache)                                          |
| B     | MAIMAC            | 102  | 08.12.18   | 01.03.19     | 82                            | 10                | 164                 | 6             | Unexplained reason                                                   |
| B     | TAMJAN            | 160  | 05.03.19   | 16.04.19     | 41                            | 70                | 82                  | 85            | No clinical improvement                                              |
| B     | NATGOG            | 173  | 19.03.19   | 04.04.19     | 45                            | 30                | 90                  | 33            | Adverse event (allergic rush, vomiting, nausea)                      |
| C     | NELBID            | 60   | 24.10.18   | 04.12.18     | 40                            | 55                | 80                  | 69            | No clinical improvement                                              |
| C     | LUBCHO            | 111  | 15.12.18   | 18.03.19     | 84                            | ?                 | 168                 | -             | The patient missed the visits, it was impossible to contact with her |
| C     | TAMKAP            | 191  | 24.04.19   | 24.06.19     | 60                            | 96                | 120                 | 80            | Adverse event (stomachache)                                          |
| D     | MZIBEG            | 45   | 16.10.18   | 20.11.18     | 34                            | 48                | 68                  | 71            | Adverse event (Increasing of hot flashes and sleep disturbances)     |
| D     | GIUBID            | 59   | 24.10.18   | 04.12.18     | 40                            | 84                | 80                  | 105           | No clinical improvement                                              |
| D     | NANVAC            | 72   | 31.10.18   | 24.12.18     | 54                            | 108               | 108                 | 100           | No clinical improvement                                              |
| D     | TAMSID            | 81   | 07.11.18   | 15.11.18     | 7                             | 6                 | 14                  | 43            | Adverse event (allergic reaction)                                    |
| D     | NAZAVD            | 130  | 30.01.19   | 12.02.19     | 12                            | 12                | 24                  | 50            | Adverse event (stomachache, nausea, vomiting)                        |

Completed = 198 (A-48, B-48, C-52, D-50), Dropouts = 22 (A-7, B-7, C-3, D-5)



Group A – 7 patients (6 - no clinical improvement, 1 – adverse events);

Group B – 7 patients, (2 – no clinical improvement, 3 – adverse events, 1 – no clinical improvement and adverse events, 1 – unexplained reason);

Group C – 3 patients (1 –no clinical improvement, 1 –unexplained reason, 1 –adverse events);

Group D – 5 patients (2 –no clinical improvement, 3 –adverse events).

Table S6. Compliance of dropout patients, % is less than estimated limit – 75%

|                | A           | B           | C           | D           |
|----------------|-------------|-------------|-------------|-------------|
|                | 102.4       | 97.1        | 68.8        | 70.6        |
|                | 109.8       | 105.0       | -           | 105.0       |
|                | 24.4        | 24.4        | 80.0        | 100.0       |
|                | 73.2        | 12.2        |             | 42.9        |
|                | 18.3        | 6.1         |             | 50.0        |
|                | 95.0        | 85.4        |             |             |
|                | 100.0       | 33.3        |             |             |
| <b>Average</b> | <b>74.7</b> | <b>51.9</b> | <b>74.4</b> | <b>73.7</b> |

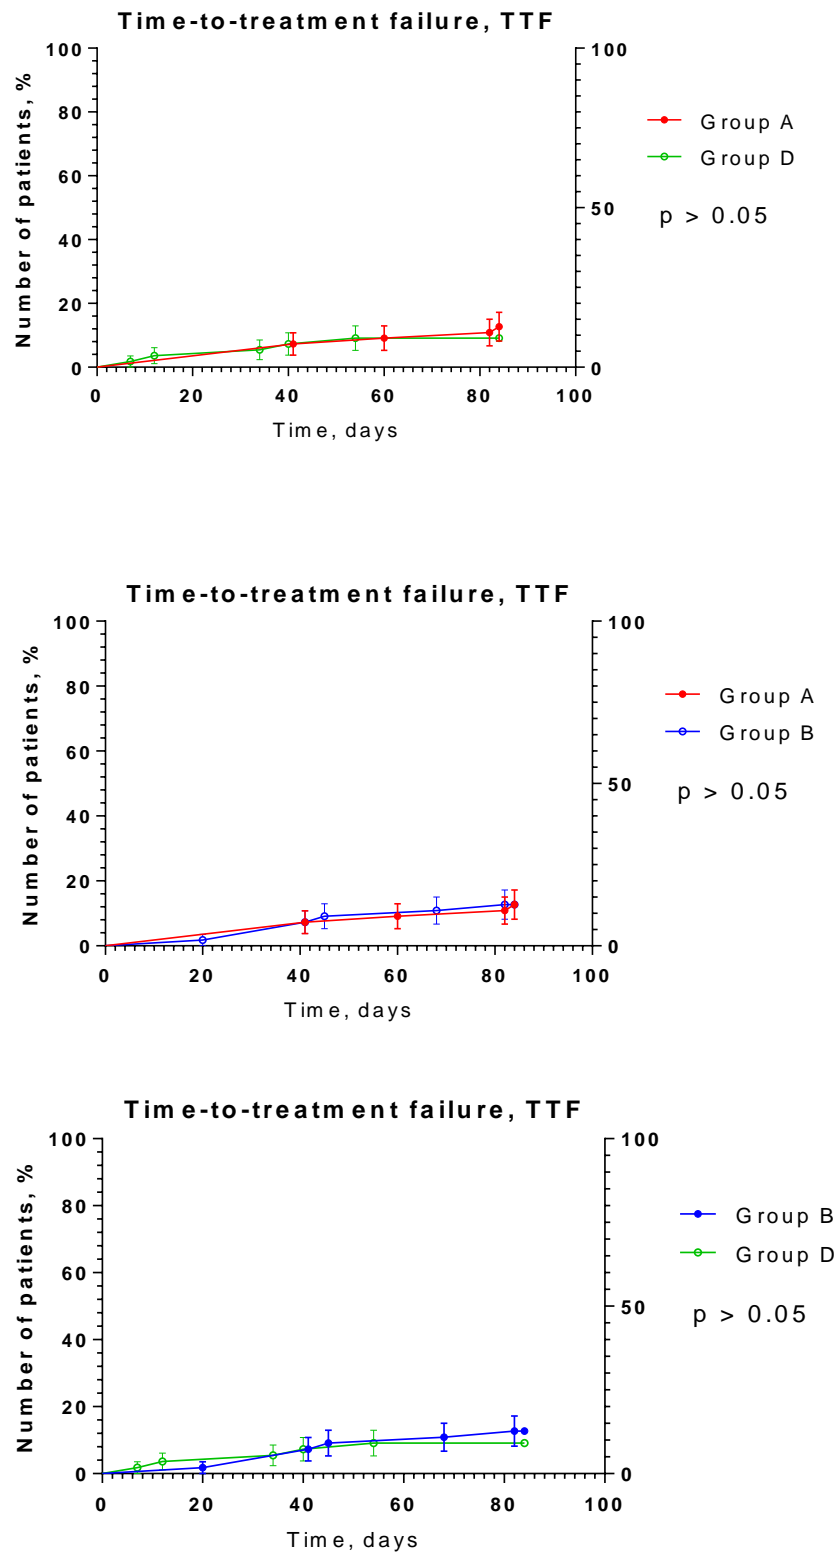

Figure S4 Time to treatment failure

Table S7 CONSORT checklist

| Section/Topic                    | Item No | Checklist item                                                                                                                                                                              | Reported on page No             |
|----------------------------------|---------|---------------------------------------------------------------------------------------------------------------------------------------------------------------------------------------------|---------------------------------|
| <b>Title and abstract</b>        |         |                                                                                                                                                                                             |                                 |
|                                  | 1a      | Identification as a randomised trial in the title                                                                                                                                           | <u>1</u>                        |
|                                  | 1b      | Structured summary of trial design, methods, results, and conclusions (for specific guidance see CONSORT for abstracts)                                                                     | <u>2</u>                        |
| <b>Introduction</b>              |         |                                                                                                                                                                                             |                                 |
| Background and objectives        | 2a      | Scientific background and explanation of rationale                                                                                                                                          | <u>4,5</u>                      |
|                                  | 2b      | Specific objectives or hypotheses                                                                                                                                                           | <u>6</u>                        |
| <b>Methods</b>                   |         |                                                                                                                                                                                             |                                 |
| Trial design                     | 3a      | Description of trial design (such as parallel, factorial) including allocation ratio                                                                                                        | <u>9, Appendix A table1</u>     |
|                                  | 3b      | Important changes to methods after trial commencement (such as eligibility criteria), with reasons                                                                                          | <u>n/a</u>                      |
| Participants                     | 4a      | Eligibility criteria for participants                                                                                                                                                       | <u>9</u>                        |
|                                  | 4b      | Settings and locations where the data were collected                                                                                                                                        | <u>8,9</u>                      |
| Interventions                    | 5       | The interventions for each group with sufficient details to allow replication, including how and when they were actually administered                                                       | <u>9,10, Appendix B</u>         |
| Outcomes                         | 6a      | Completely defined pre-specified primary and secondary outcome measures, including how and when they were assessed                                                                          | <u>12,13, Table1 Appendix C</u> |
|                                  | 6b      | Any changes to trial outcomes after the trial commenced, with reasons                                                                                                                       | <u>n/a</u>                      |
| Sample size                      | 7a      | How sample size was determined                                                                                                                                                              | <u>14</u>                       |
|                                  | 7b      | When applicable, explanation of any interim analyses and stopping guidelines                                                                                                                | <u>n/a</u>                      |
| <b>Randomisation:</b>            |         |                                                                                                                                                                                             |                                 |
| Sequence generation              | 8a      | Method used to generate the random allocation sequence                                                                                                                                      | <u>10</u>                       |
|                                  | 8b      | Type of randomisation; details of any restriction (such as blocking and block size)                                                                                                         | <u>10</u>                       |
| Allocation concealment mechanism | 9       | Mechanism used to implement the random allocation sequence (such as sequentially numbered containers), describing any steps taken to conceal the sequence until interventions were assigned | <u>10</u>                       |

|                                                      |     |                                                                                                                                                   |                                         |
|------------------------------------------------------|-----|---------------------------------------------------------------------------------------------------------------------------------------------------|-----------------------------------------|
| Implementation                                       | 10  | Who generated the random allocation sequence, who enrolled participants, and who assigned participants to interventions                           | <a href="#">10</a>                      |
| Blinding                                             | 11a | If done, who was blinded after assignment to interventions (for example, participants, care providers, those assessing outcomes) and how          | <a href="#">10,11</a>                   |
|                                                      | 11b | If relevant, description of the similarity of interventions                                                                                       | <a href="#">10</a>                      |
| Statistical methods                                  | 12a | Statistical methods used to compare groups for primary and secondary outcomes                                                                     | <a href="#">13</a>                      |
|                                                      | 12b | Methods for additional analyses, such as subgroup analyses and adjusted analyses                                                                  | <a href="#">Appendix D</a>              |
| <b>Results</b>                                       |     |                                                                                                                                                   |                                         |
| Participant flow (a diagram is strongly recommended) | 13a | For each group, the numbers of participants who were randomly assigned, received intended treatment, and were analysed for the primary outcome    | <a href="#">3, Figures 1-3, Table 1</a> |
|                                                      | 13b | For each group, losses and exclusions after randomisation, together with reasons                                                                  | <a href="#">3</a>                       |
| Recruitment                                          | 14a | Dates defining the periods of recruitment and follow-up                                                                                           | <a href="#">8</a>                       |
|                                                      | 14b | Why the trial ended or was stopped                                                                                                                | <a href="#">n/a</a>                     |
| Baseline data                                        | 15  | A table showing baseline demographic and clinical characteristics for each group                                                                  | <a href="#">Table 1</a>                 |
| Numbers analysed                                     | 16  | For each group, number of participants (denominator) included in each analysis and whether the analysis was by original assigned groups           | <a href="#">3, Figures 1-3, Table 1</a> |
| Outcomes and estimation                              | 17a | For each primary and secondary outcome, results for each group, and the estimated effect size and its precision (such as 95% confidence interval) | <a href="#">Figures 1-3, Appendix D</a> |
|                                                      | 17b | For binary outcomes, presentation of both absolute and relative effect sizes is recommended                                                       | <a href="#">Figures 1-3, Appendix D</a> |
| Ancillary analyses                                   | 18  | Results of any other analyses performed, including subgroup analyses and adjusted analyses, distinguishing pre-specified from exploratory         | <a href="#">n/a</a>                     |
| Harms                                                | 19  | All-important harms or unintended effects in each group                                                                                           | <a href="#">6</a>                       |
| <b>Discussion</b>                                    |     |                                                                                                                                                   |                                         |
| Limitations                                          | 20  | Trial limitations, addressing sources of potential bias, imprecision, and, if relevant, multiplicity of analyses                                  | <a href="#">8,</a>                      |
| Generalisability                                     | 21  | Generalisability (external validity, applicability) of the trial findings                                                                         | <a href="#">8</a>                       |
| Interpretation                                       | 22  | Interpretation consistent with results, balancing benefits and harms, and considering other relevant evidence                                     | <a href="#">8</a>                       |
| <b>Other information</b>                             |     |                                                                                                                                                   |                                         |
| Registration                                         | 23  | Registration number and name of trial registry                                                                                                    | <a href="#">6</a>                       |
| Protocol                                             | 24  | Where the full trial protocol can be accessed, if available                                                                                       | <a href="#">14</a>                      |
| Funding                                              | 25  | Sources of funding and other support (such as supply of drugs), role of funders                                                                   | <a href="#">14</a>                      |
